# Supplementary material
Source: Springer Nature journal article supplement (https://www.springermedizin.de/resource/supplementary/13031_2009_35_MOESM1_ESM.pdf/9644980)
Supplement: MOESM1 [file 9644980]

**Additional File 1** Table showing independent t-test values across gender and nationality for key indicators

| <b>Indicator</b>              | <b>Men<br/>S/R</b>         | <b>Women<br/>S/R</b>       | <b>Somali M/F</b>         | <b>Rwandese<br/>M/F</b>   | <b>Nationality<br/>S/R</b> |
|-------------------------------|----------------------------|----------------------------|---------------------------|---------------------------|----------------------------|
| <b>No. of lifetime events</b> | T(501) = 2.79<br>p < .005  | T(383) = 9.78<br>p < .000  | ns                        | T(901) = 8.18<br>p < .000 | T(896) = 9.65<br>p < .000  |
| <b>No. of recent events</b>   | ns                         | T(265) = 2.28<br>p = .023  | ns                        | ns                        | T(572) = 2.9<br>p < .004   |
| <b>PDS sum score</b>          | T(400) = 7.84<br>p < .000  | T(334) = 11.92<br>P < .000 | ns                        | T(904) = 2.89<br>p < .004 | T(727) = 14.21<br>p < .000 |
| <b>Intrusions</b>             | T(385) = 6.14<br>p < .000  | T(338) = 10.54<br>p < .000 | ns                        | T(904) = 2.8<br>p < .005  | T(719) = 11.91<br>p < .000 |
| <b>Avoidance</b>              | T(422) = 7.75<br>p < .000  | T(355) = 12.41<br>p < .000 | ns                        | T(746) = 3.58<br>p < .000 | T(772) = 14.45<br>p < .000 |
| <b>Active Avoidance</b>       | T(471) = 10.27<br>p < .000 | T(388) = 14.08<br>p < .000 | ns                        | T(903) = 2.26<br>p = .024 | T(853) = 17.45<br>p < .000 |
| <b>Passive Avoidance</b>      | T(378) = 4.66<br>p < .000  | T(325) = 8.83<br>p < .000  | ns                        | T(722) = 4.2<br>p < .000  | T(698) = 9.69<br>p < .000  |
| <b>Arousal</b>                | T(389) = 7.26<br>p < .000  | T(323) = 10.06<br>p < .000 | T(500) = 2.36<br>p = .019 | ns                        | T(703) = 12.35<br>p < .000 |
| <b>Anxiety</b>                | ns                         | T(339) = 6.91<br>P < .000  | T(490) = 3.55<br>p < .000 | ns                        | T(755) = 6.88<br>p < .000  |
| <b>Depression</b>             | T(331) = 11.74<br>p < .000 | T(289) = 14.77<br>p < .000 | ns                        | T(742) = 2.52<br>p = .012 | T(614) = 18.93<br>p < .000 |
| <b>Household size</b>         | T(494) = 7.55<br>p < .000  | T(352) = 8.22<br>p < .000  | T(514) = 3.03<br>p < .003 | T(725) = 3.8<br>p < .000  | T(819) = 10.81<br>p < .000 |
| <b>Camp years</b>             | T(626) = 15.02<br>p < .000 | T(784) = 16.83<br>p < .000 | ns                        | ns                        | T(1203) = 23.4<br>p < .000 |
| <b>Education</b>              | T(454) = 9.95<br>p < .000  | ns                         | T(496) = 9.99<br>p < .000 | T(902) = 3.38<br>p < .001 | T(805) = 8.45<br>P < .000  |
| <b>Asset value</b>            | ns                         | ns                         | ns                        | T(555) = 4.04             | ns                         |

|                          |                               |                           |                               |                               |                                |
|--------------------------|-------------------------------|---------------------------|-------------------------------|-------------------------------|--------------------------------|
|                          |                               |                           |                               | p < .000                      |                                |
| <b>Meals</b>             | T(622) =<br>14.66<br>p < .000 | T(755) = 23.0<br>p < .000 | T(486) =<br>2.58<br>p = .010  | T(902) = 2.03<br>p = .043     | T(1371) =<br>26.24<br>p < .000 |
| <b>Age</b>               | T(625) = 5.89<br>p < .000     | ns                        | ns                            | T(898) = 4.19<br>p < .000     | T(1412) =<br>4.71<br>p < .000  |
| <b>Drug Sum</b>          | T(494) = 4.1<br>p < .000      | T(539) = 6.22<br>p < .000 | T(253) =<br>3.85<br>p < .000  | T (391) =<br>4.84<br>p < .000 | T(1299) =<br>4.95<br>p < .000  |
| <b>Functioning</b>       | ns                            | ns                        | ns                            | T (377) =<br>3.94<br>p < .000 | ns                             |
| <b>Health</b>            | ns                            | ns                        | ns                            | ns                            | ns                             |
| <b>Sexual<br/>Events</b> | ns                            | T(339) = 4.5<br>p < .000  | T(246) =<br>11.33<br>p < .000 | T(846) = 4.46<br>p < .000     | T(316) = 5.3<br>p < .000       |
